# Supplementary material for: Sleep Diagnostics for Home Monitoring of Sleep Apnea Patients
Source: Frontiers journal article supplement (doi:10.3389/fdgth.2021.685766), 2021-06-15
Supplement: Table_1.pdf [file Table_1.pdf]

|              |      | Prediction (%) |      |
|--------------|------|----------------|------|
|              |      | Sleep          | Wake |
| Ground Truth | N3   | 3.1            | 1.7  |
|              | N2   | 10.6           | 6.8  |
|              | N1   | 2.3            | 2.8  |
|              | REM  | 10.0           | 7.8  |
|              | Wake | 5.7            | 19.1 |

**Table 1.** To investigate the cause of uncertainty for non-apneic epochs, the ground truth sleep stages of these epochs were extracted for CNN\_Test. The percentage indicates the **ratio of uncertain non-apneic epochs to the total number of epochs**. The largest portion of uncertain sleep predicted, non-apneic epochs were found during N2 and REM sleep as indicated in grey.
